# Supplementary material for: Translational dynamics of photoexcited atoms in 4He nanodroplets: the case of silver
Source: Royal Society of Chemistry journal article supplement (doi:10.1039/c3cp52221k), 2013-01-01
Supplement: c3cp52221k.zip [file c3cp52221k.zip]

File: Ag-01-1o2.mpeg

Title: Ag@4He1000 dynamics upon photoexcitation (R0= 1 Å; P1/2 state)

Legend: Dynamical evolution of a silver atom in a 4He droplet of 1000 atoms upon photoexcitation to the P1/2 state computed within TDDFT. The starting position of the silver atom is R0= 1 Å with respect to the droplet center of mass.

Tags: Physics, Condensed Matter, Helium, TDDFT, Dynamics, Picosecond, Desorption, Droplet, Impurities.

File: Ag-07-1o2.mpeg

Title: Ag@4He1000 dynamics upon photoexcitation (R0= 7 Å; P1/2 state)

Legend: Dynamical evolution of a silver atom in a 4He droplet of 1000 atoms upon photoexcitation to the P1/2 state computed within TDDFT. The starting position of the silver atom is R0= 7 Å with respect to the droplet center of mass.

Tags: Physics, Condensed Matter, Helium, TDDFT, Dynamics, Picosecond, Desorption, Droplet, Impurities.

File: Ag-10-1o2.mpeg

Title: Ag@4He1000 dynamics upon photoexcitation (R0= 10 Å; P1/2 state)

Legend: Dynamical evolution of a silver atom in a 4He droplet of 1000 atoms upon photoexcitation to the P1/2 state computed within TDDFT. The starting position of the silver atom is R0= 10 Å with respect to the droplet center of mass.

Tags: Physics, Condensed Matter, Helium, TDDFT, Dynamics, Picosecond, Desorption, Droplet, Impurities.

File: Ag-14-1o2.mpeg

Title: Ag@4He1000 dynamics upon photoexcitation (R0= 14 Å; P1/2 state)

Legend: Dynamical evolution of a silver atom in a 4He droplet of 1000 atoms upon photoexcitation to the P1/2 state computed within TDDFT. The starting position of the silver atom is R0= 14 Å with respect to the droplet center of mass.

Tags: Physics, Condensed Matter, Helium, TDDFT, Dynamics, Picosecond, Desorption, Droplet, Impurities.

File: Ag-18-1o2.mpeg

Title: Ag@4He1000 dynamics upon photoexcitation (R0= 18Å; P1/2 state)

Legend: Dynamical evolution of a silver atom in a 4He droplet of 1000 atoms upon photoexcitation to the P1/2 state computed within TDDFT. The starting position of the silver atom is R0= 18 Å with respect to the droplet center of mass.

Tags: Physics, Condensed Matter, Helium, TDDFT, Dynamics, Picosecond, Desorption, Droplet, Impurities.

File: Ag-18-mixed3o2.mpeg

Title: Ag@4He1000 dynamics upon photoexcitation (R0= 18Å; mixed P3/2 state)

Legend: Dynamical evolution of a silver atom in a 4He droplet of 1000 atoms upon photoexcitation to the mixed P3/2 state computed within TDDFT. The starting position of the silver atom is R0= 18 Å with respect to the droplet center of mass.

Tags: Physics, Condensed Matter, Helium, TDDFT, Dynamics, Picosecond, Desorption, Droplet, Impurities.

File: Ag-18-pure3o2.mpeg

Title: Ag@4He1000 dynamics upon photoexcitation (R0= 18 Å; pure P3/2 state)

Legend: Dynamical evolution of a silver atom in a 4He droplet of 1000 atoms upon photoexcitation to the pure P3/2 state computed within TDDFT. The starting position of the silver atom is R0= 18 Å with respect to the droplet center of mass.

Tags: Physics, Condensed Matter, Helium, TDDFT, Dynamics, Picosecond, Desorption, Droplet, Impurities.

File: Ag-22-1o2.mpeg

Title: Ag@4He1000 dynamics upon photoexcitation (R0= 22 Å; P1/2 state)

Legend: Dynamical evolution of a silver atom in a 4He droplet of 1000 atoms upon photoexcitation to the P1/2 state computed within TDDFT. The starting position of the silver atom is R0= 22 Å with respect to the droplet center of mass.

Tags: Physics, Condensed Matter, Helium, TDDFT, Dynamics, Picosecond, Desorption, Droplet, Impurities.

File: Ag-25-1o2.mpeg

Title: Ag@4He1000 dynamics upon photoexcitation (R0= 25 Å; P1/2 state)

Legend: Dynamical evolution of a silver atom in a 4He droplet of 1000 atoms upon photoexcitation to the P1/2 state computed within TDDFT. The starting position of the silver atom is R0= 25 Å with respect to the droplet center of mass.

Tags: Physics, Condensed Matter, Helium, TDDFT, Dynamics, Picosecond, Desorption, Droplet, Impurities.
